# Supplementary material for: STEMMUS-MODFLOW v1.0.0: Integrated Understanding of Soil Water and Groundwater Flow Processes: Case Study of the Maqu Catchment, north-eastern Tibetan Plateau
Source: Copernicus journal article supplement (doi:10.5194/gmd-2022-221), 2023-05-03
Supplement: Supplementary file [file gmd-2022-221-AC2-supplement.pdf]

Anonymous Referee #2

**General comments.**

[1] **RC2:** The paper aims to develop and validate a soil water-groundwater model, STEMMUS-MODFLOW, that accounts for the vadose zone processes and their interactions with the groundwater flow using a two-way feedback coupling scheme.

**Response:** We thank the reviewer very much for the time and effort and also for the helpful comments.

[2] **RC2:** I appreciate the authors' effort in writing this paper, but I found it hard to read and understand. I think the paper needs to be restructured with a focus on clarity and cohesion and resubmitted. I also noticed that most of the questions that I had from reading the paper were already asked by reviewer 1. I would like the authors to address those questions in addition to improving the writing quality of the paper.

**Response:** We restructure the manuscript, by stating clearly the main interest of this manuscript, adding more explanation of the methods. Please see our response to RC1.

We have the manuscript English edited.
